# Supplementary material for: Inclusion complexes synthesized from an ABA triblock polymer and β-cyclodextrins: amplification of hydrophobic interaction along a hydrophilic polymer chain
Source: Royal Society of Chemistry journal article supplement (doi:10.1039/c4ra03827d), 2014-01-01
Supplement: c4ra03827d1.pdf [file c4ra03827d1.pdf]

## Electronic Supplementary Information:

Table S1. Yields of IC1113 as a function of amounts of added CP1113 in 25mL saturated aqueous solutions of  $\beta$ -CD (0.16 mol L<sup>-1</sup>)

| <i>Items</i>                                                              | <i>Ex.1</i> | <i>Ex.2</i> | <i>Ex.3</i> | <i>Ex.4</i> | <i>Ex.5</i> | <i>Ex.6</i> | <i>Ex.7</i> | <i>Ex.8</i> |
|---------------------------------------------------------------------------|-------------|-------------|-------------|-------------|-------------|-------------|-------------|-------------|
| Mass of Added CP1113 (g)                                                  | 0.0000      | 0.1000      | 0.2000      | 0.3000      | 0.4000      | 0.5000      | 0.6000      | 0.7000      |
| Amount of added CP1113 (mmol)                                             | 0.0000      | 0.04153     | 0.08306     | 0.1246      | 0.1661      | 0.2076      | 0.2492      | 0.2907      |
| Concentrtion of added CP1113 (mmol L <sup>-1</sup> ) <sup>a</sup>         | 0.0000      | 1.6612      | 3.3224      | 4.9840      | 6.6440      | 8.3040      | 9.9680      | 11.6280     |
| Theoretical precipitated $\beta$ -CD (g) <sup>b</sup>                     | 4.1250      | 4.1250      | 4.1250      | 4.1250      | 4.1250      | 4.1250      | 4.1250      | 4.1250      |
| Actually mass of $\beta$ -CD residue (g) <sup>c</sup>                     | 4.1150      | 4.0510      | 3.7331      | 3.4691      | 2.7885      | 2.2192      | 2.2522      | 2.2275      |
| Theoretically calculated amount of $\beta$ -CD in ICs (g) <sup>d</sup>    | 0.0200      | 0.0740      | 0.3919      | 0.6559      | 1.3365      | 1.9058      | 1.8728      | 1.8975      |
| Theoretical calculated amount of $\beta$ -CD in ICs (mmol)                | 0.01762     | 0.06520     | 0.3453      | 0.5779      | 1.1178      | 1.6791      | 1.6500      | 1.6718      |
| Theoretical calculated amount of ICs (g) <sup>e</sup>                     | 0.0200      | 0.1740      | 0.5919      | 0.9559      | 1.7365      | 2.4058      | 2.4728      | 2.5975      |
| Actual amount of ICs (g)                                                  | 0.0000      | 0.1515      | 0.5619      | 0.9084      | 1.7015      | 2.4683      | 2.4228      | 2.5300      |
| Actual yields of ICs (%) <sup>f</sup>                                     | 0.4848      | 1.7939      | 9.5006      | 15.9006     | 32.4000     | 46.2012     | 45.4012     | 46.0000     |
| Errors of yields of ICs (%) <sup>g</sup>                                  | -0.4848     | -0.5455     | -0.7273     | -1.1515     | -0.8485     | +1.5152     | -1.2121     | -1.6364     |
| The molar stoichiometry ratio between $\beta$ -CD and CP1113 <sup>h</sup> | —           | 1.5699      | 4.1572      | 4.6380      | 6.7297      | 8.0882      | 6.6212      | 5.7909      |

**a:**Concentrtion of added CP1113 (mmol L<sup>-1</sup>) was calculated in accordance with a volume-fixed 25 mL  $\beta$ -CD solution;

**b:**Theoretical precipitated  $\beta$ -CD (g) was calculated to be constant value according to the solubility differences between 80°C to 20°C in a volume-fixed 25 mL solution;

**c:**Actually mass of  $\beta$ -CD residue (g) was separated from the mother liquor or in crystal state at the flask bottom without complexation;

**d:**Theoretically calculated amount of  $\beta$ -CD in ICs (g) was calculated from [Theoretical precipitated  $\beta$ -CD] subtracting [Actually mass of  $\beta$ -CD residue];

**e:**Theoretical calculated amount of ICs (g) was calculated from [Theoretically calculated amount of  $\beta$ -CD in ICs] + [Mass of Added CP1113];

**f:**Actual yields of ICs (%) was calculated from [Theoretical calculated amount of  $\beta$ -CD in ICs]/[Theoretical precipitated  $\beta$ -CD];

**g:**Errors of yields of ICs (%) was calculated from [(Theoretical calculated amount of ICs)-(Actual amount of ICs)]/[Theoretical precipitated  $\beta$ -CD];

**h:**The molar stoichiometry ratio between  $\beta$ -CD and CP1113 was calculated from [Theoretical calculated amount of  $\beta$ -CD in ICs]/[Amount of added CP1113].

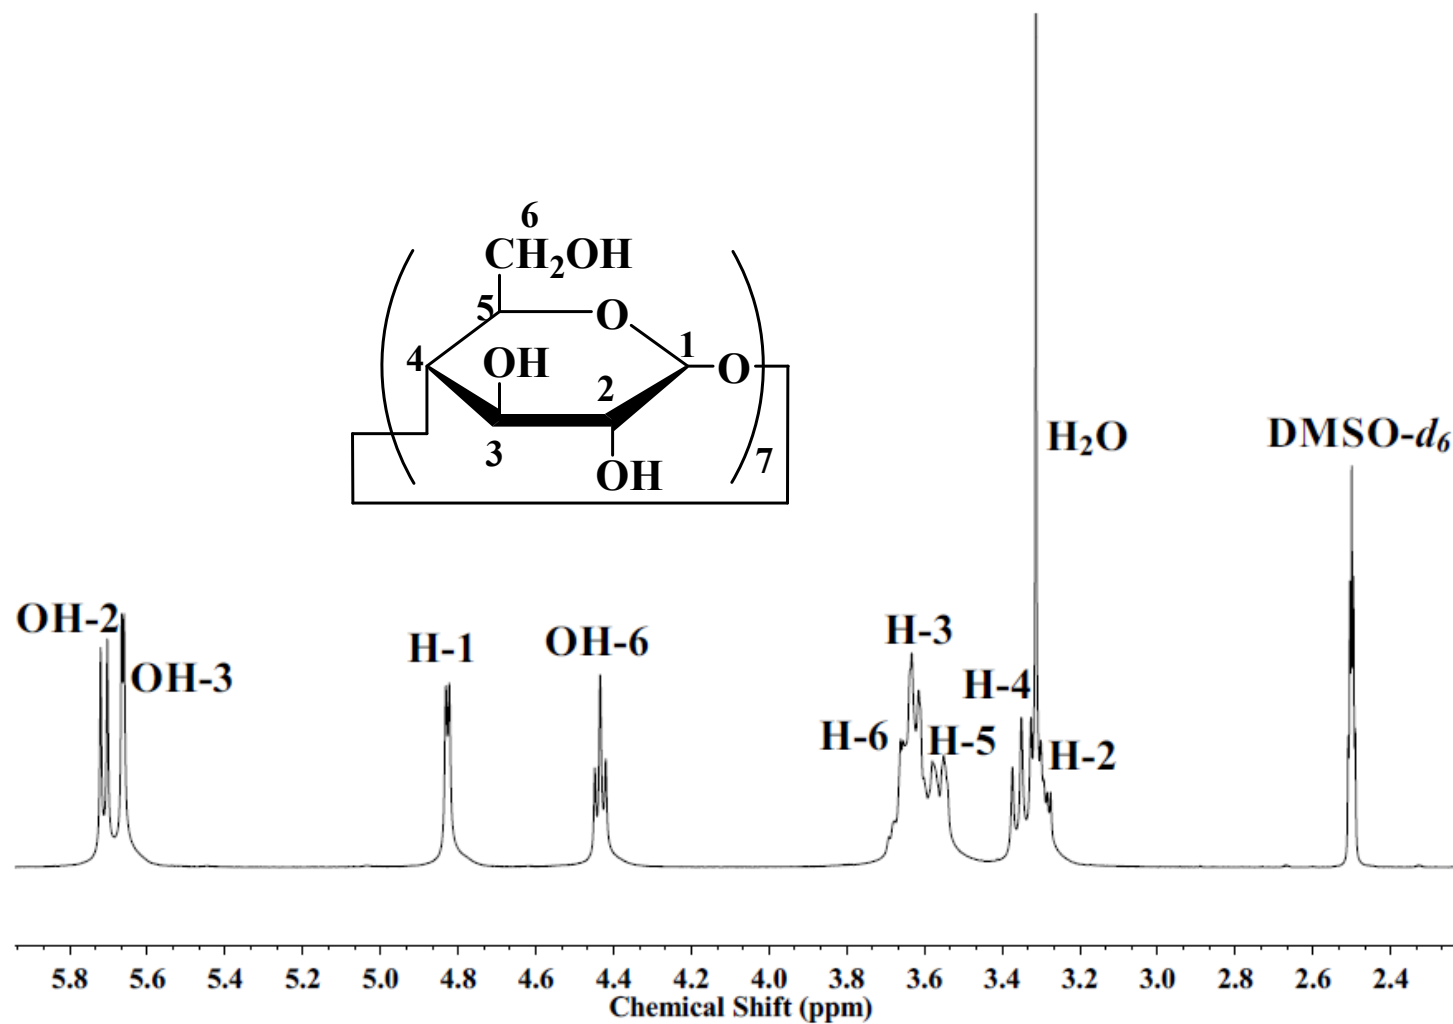

Fig.S1  $^1\text{H}$ -NMR spectrum of  $\beta$ -CD in  $\text{DMSO-}d_6$  at 298.15K.

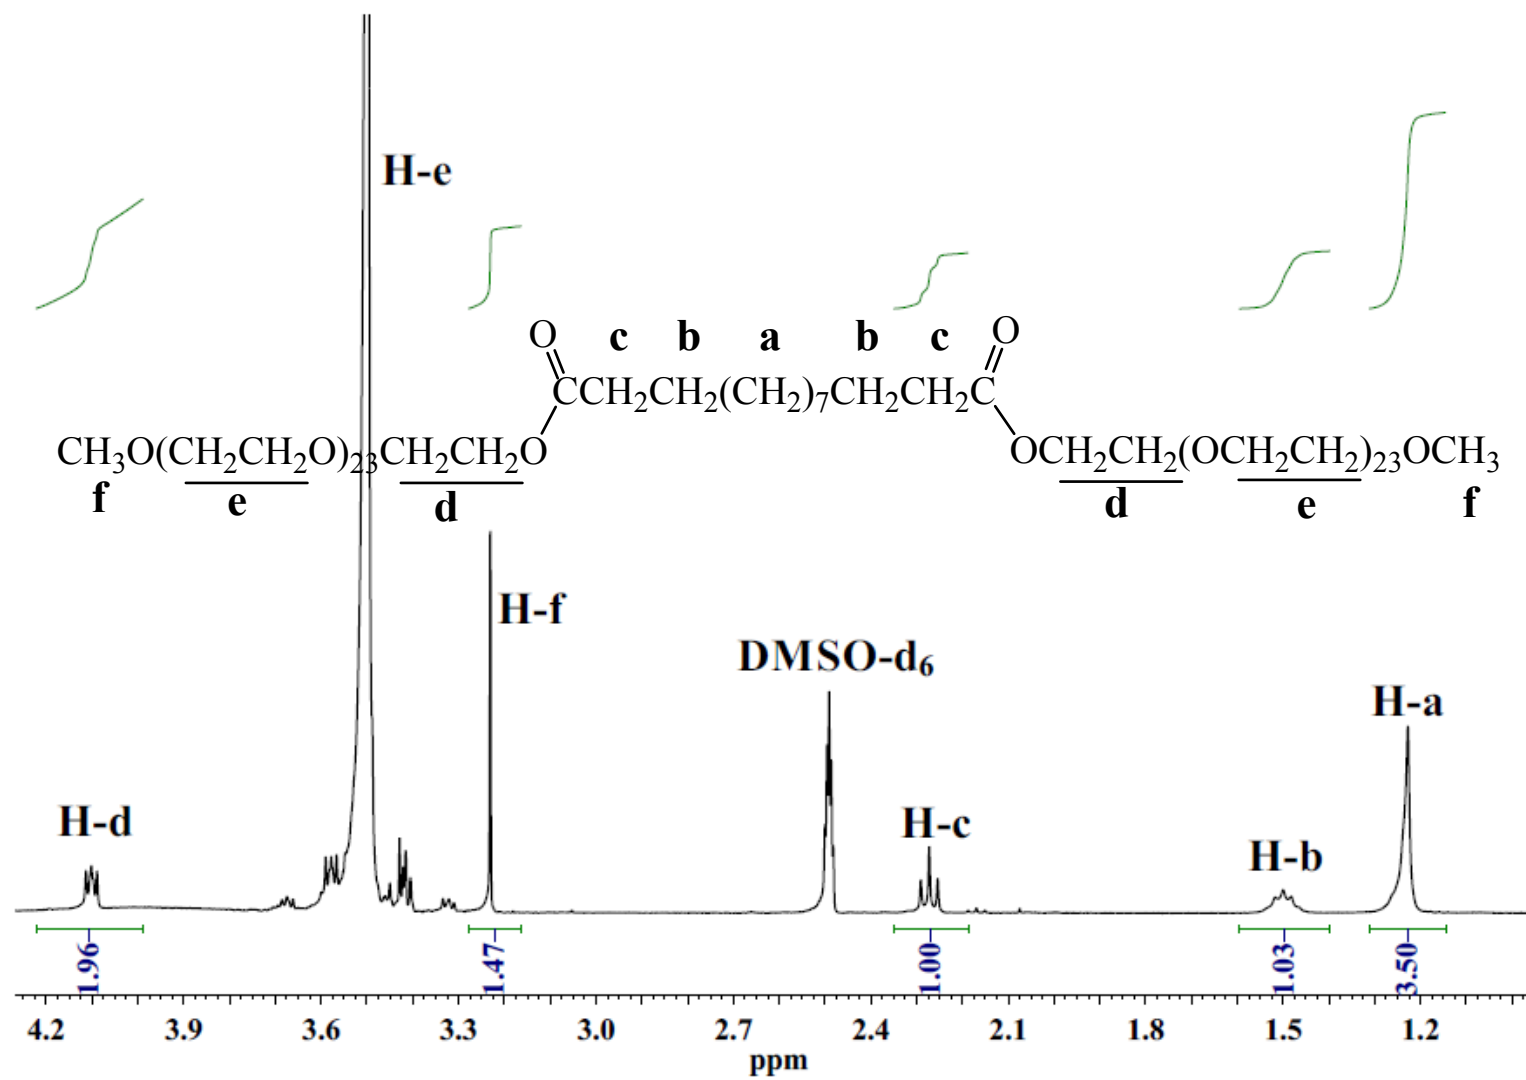

Fig.S2  $^1\text{H}$ -NMR spectrum of CP1113 in  $\text{DMSO-d}_6$  at 298.15K.

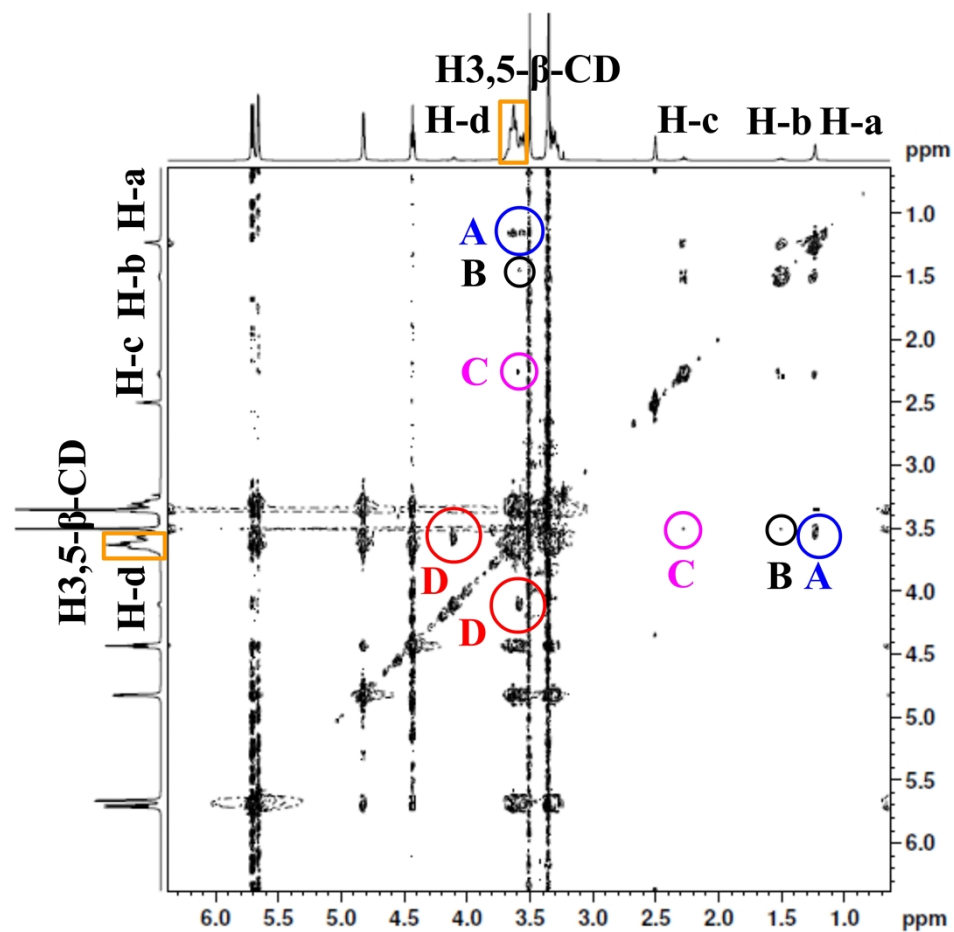

Fig.S3 2D ROSEY spectrum of IC1113 partially dissolved in DMSO- $d_6$  at 298.15K with 5 min of ultrasonication (four kinds of cross peaks with different strength are assigned to the interactions between H3, H5 of  $\beta$ -CD and : A. H-a, B. H-b, C. H-c, D. H-d of CP1113)

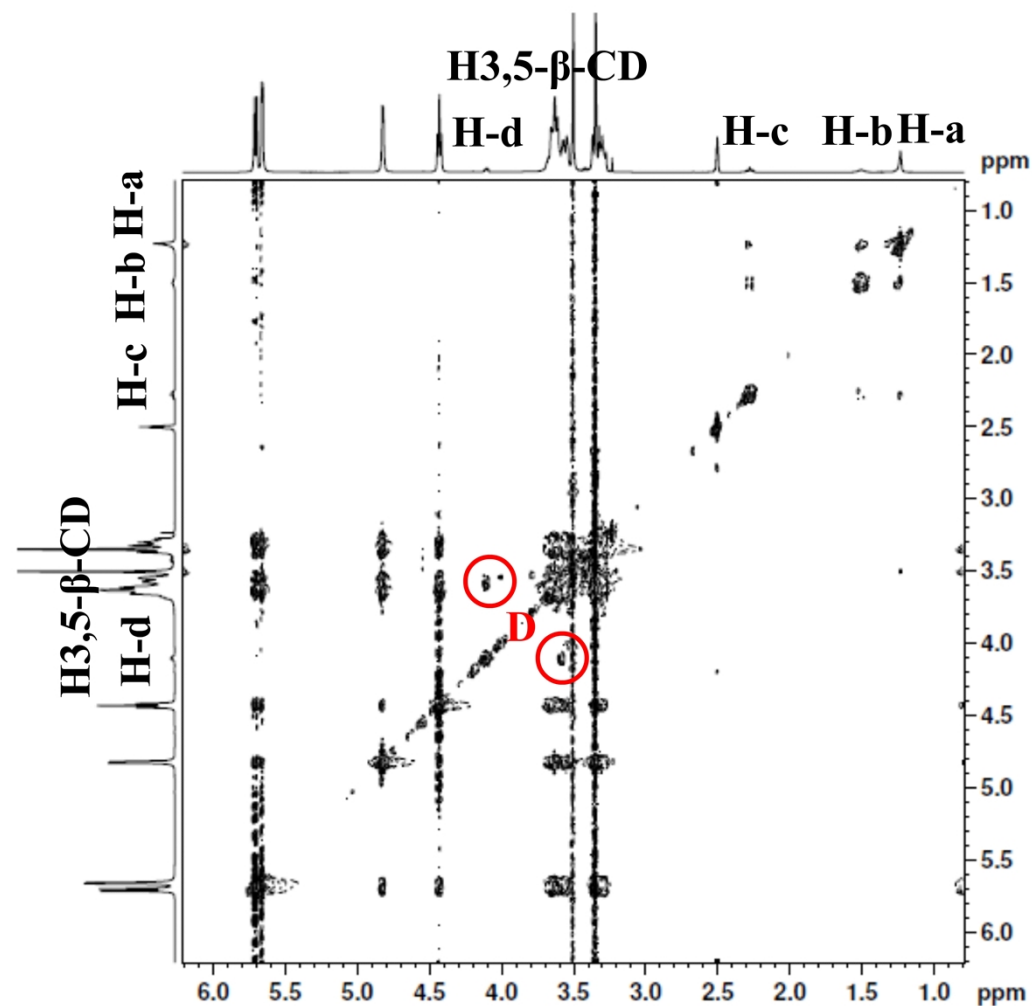

Fig.S4 2D ROSEY spectrum of IC1113 fully dissolved in DMSO- $d_6$  at 298.15K with 30 min of ultrasonication (two weak cross peaks in red circles are assigned to interaction of H3, H5 of  $\beta$ -CD and H-d of CP1113, the underlined part in  $\text{CH}_3(\text{OCH}_2\text{CH}_2)_{23}\text{O}$   $\text{CH}_2\text{CH}_2\text{O}$ -CO(CH $_2$ ) $_{11}$ CO-O $\text{CH}_2\text{CH}_2\text{O}$ (CH $_2\text{CH}_2\text{O}$ ) $_{23}$ CH $_3$ )

Table S2. Comparison of experimental results between this work and several previous relevant literatures

| <i>Systems</i>                                                                                  | <i>Molecular structure of guest polymers</i>                                                           | <i>Molar ratio of <math>\beta</math>-CDs to the included polymers (or copolymers)</i>             | <i>Molar ratio of <math>\beta</math>-CD to non-PEG polymer segments</i> | <i>Number of EG segments per <math>\beta</math>-CD</i> |
|-------------------------------------------------------------------------------------------------|--------------------------------------------------------------------------------------------------------|---------------------------------------------------------------------------------------------------|-------------------------------------------------------------------------|--------------------------------------------------------|
| IC1113 in this work                                                                             | H <sub>3</sub> COEG <sub>~24</sub> (CH <sub>2</sub> ) <sub>11</sub> EG <sub>~24</sub> OCH <sub>3</sub> | ~7.8:1                                                                                            | ~2:1 (to ME segments) <sup>e</sup>                                      | ~8.28 <sup>f</sup>                                     |
| IC between $\beta$ -CD and PEG <sup>a</sup>                                                     | EG <sub>n</sub> , where n was not given                                                                | Not given                                                                                         | —                                                                       | 3                                                      |
| IC between $\beta$ -CD and PPG <sup>b</sup>                                                     | PG <sub>~17</sub>                                                                                      | Not given                                                                                         | 1:2 (with PG segments) <sup>b</sup>                                     | —                                                      |
| Polypseudorotaxane from $\beta$ -CD and PPG <sup>c</sup>                                        | H <sub>2</sub> N-PG <sub>~34</sub> -NH <sub>2</sub>                                                    | ~13:1                                                                                             | 1:2.6 (with PG segments) <sup>c</sup>                                   | —                                                      |
| Polypseudorotaxane prepared from $\beta$ -CD and PEG- <i>b</i> -PPG- <i>b</i> -PEG <sup>d</sup> | residue-EG <sub>~22</sub> PG <sub>~39</sub> EG <sub>~22</sub> -residue                                 | ~17:1 (experimental)<br>~19:1, (theoretically calculated value according to literature <b>b</b> ) | 1:2 (with PG segments) <sup>b</sup>                                     | Cannot be determined even if there is <sup>g</sup>     |
| Polyrotaxane prepared from $\beta$ -CD and PEG- <i>b</i> -PPG- <i>b</i> -PEG <sup>d</sup>       | stopper-EG <sub>~22</sub> PG <sub>~39</sub> EG <sub>~22</sub> -stopper                                 | ~7:1 (experimental)<br>~19:1 (theoretically calculated value according to literature <b>b</b> )   | 1:2 (with PG segments) <sup>b</sup>                                     | Cannot be determined even if there is <sup>g</sup>     |

**a:** K. A. Udachin, L.D. Wilson and J.A. Ripmeester, *J. Am. Chem. Soc.*, 2000, **122**, 12375-12376.

**b:** A. Harada, M. Okada, J. Li and M. Kamachi, *Macromolecules*, 1995, **28**, 8406-8411.

**c:** S. Liu, J. Cai, L. Ren, L. Wang and Y.J. Wang, *RSC Adv.*, 2014, **4**, 18608–18611

**d:** H. Fujita, T. Ooya and N. Yui, *Macromolecules*, 1999, **32**, 2534-2541.

**e:** J. G. Gao, Y. J. Ding, H. W. Chen, Q. P. Song and Q. J. Zhang, *Chin. J. Chem. Phys.*, 2008, **21**, 387-392.

**f:** Number of EG segments per  $\beta$ -CD was calculated from  $[EG \text{ segments in one CP1113 mainchain}]/[(\text{Molar ratio of } \beta\text{-CDs to the included polymers}) - (\text{Molar ratio of } \beta\text{-CD to non-PEG polymer segments})]$ , that is  $48/(7.8-2)$  accordingly.

**g:** According to the theoretically molar ratio of  $\beta$ -CD to PG segments of 1:2, the molar ratio of EG segments to  $\beta$ -CD cannot be calculated because the central PG segments (ca. 39) needed more  $\beta$ -CDs (ca. 19) than the experimental numbers (ca. 17 or 7) of the accommodated  $\beta$ -CDs, so it is not sure that  $\beta$ -CDs reside on the PEG segments or not.

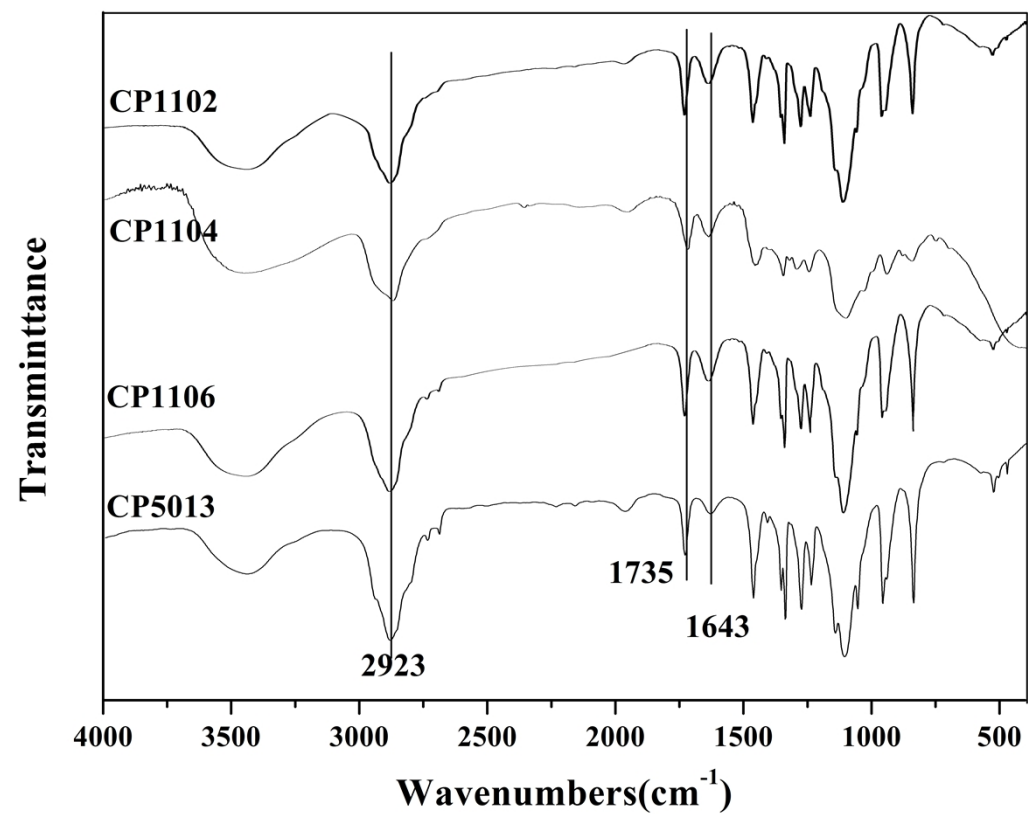

Fig.S5 FTIR spectra of analogous triblock polymers prepared from MePEG and diacids (CP1102: MePEG1100 and oxalic acid; CP1104: MePEG1100 and succinic acid; CP1106: MePEG1100 and adipic acid; CP5013: MePEG5000 and DA13)

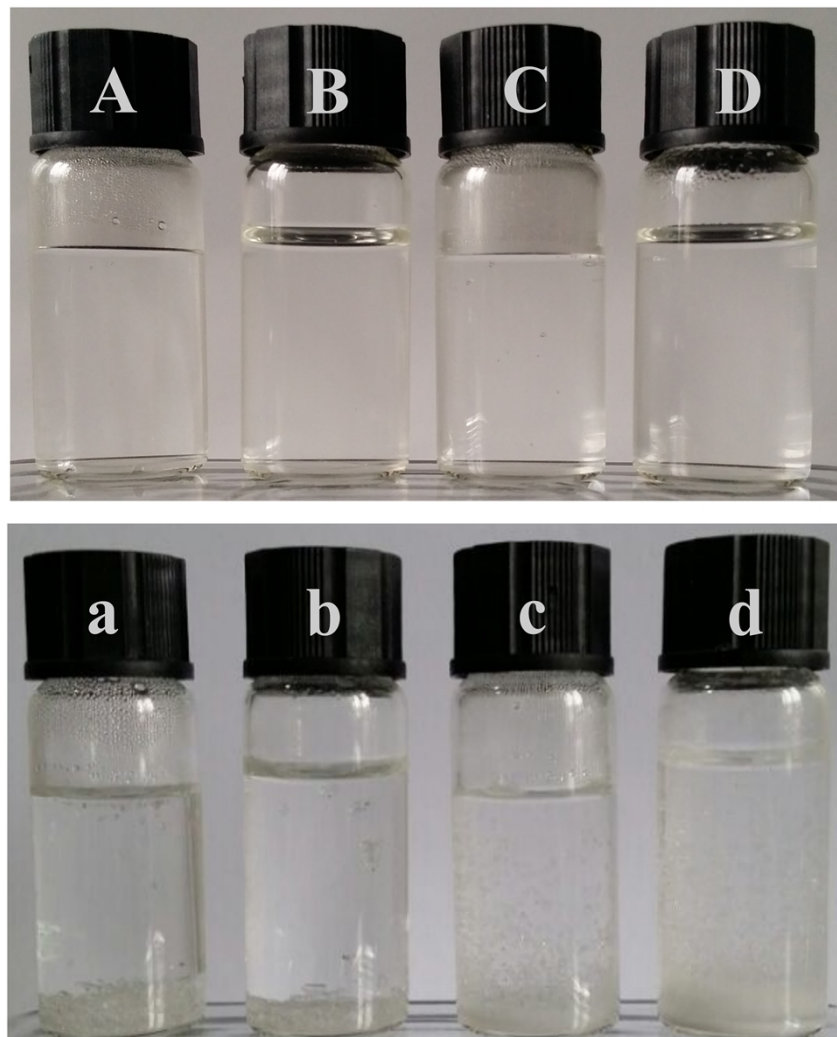

Fig.S6 Optical graphs of the beginning (80 °C, upper) and ending (20 °C, lower) states for four triblock polymers with  $\beta$ -CD (A and a: CP1102; B and b: CP1104; C and c: CP1106; D and d: CP5013).
